# Supplementary material for: Supramolecular structural control: photochemical reactions between styrylpyridine derivative and cucurbit[7,8]urils
Source: Royal Society of Chemistry journal article supplement (doi:10.1039/d2nj03718a), 2023-01-01
Supplement: d2nj03718a1.pdf [file d2nj03718a1.pdf]

## Electronic Supplementary Information

# Supramolecular structural control: photochemical reactions between styrylpyridine derivative and cucurbit[7,8]urils

Shang-Wei Yuan,<sup>a</sup> Heng Wu,<sup>a</sup> Xi Nan Yang,<sup>a</sup> Mao-Xia Yang,<sup>a</sup> Yang Luo,<sup>a</sup> Wen Min,<sup>a</sup>  
Zhen-Feng Lu,<sup>a</sup> Carl Redshaw,<sup>b</sup> Zhu Tao<sup>a</sup> and Xin Xiao<sup>\*a</sup>

<sup>a</sup> Key Laboratory of Macrocyclic and Supramolecular Chemistry of Guizhou Province, Guizhou  
University, Guiyang 550025, China.

<sup>b</sup> Department of Chemistry, University of Hull, Hull HU6 7RX, U.K

E-mail: gyhxxiaoxin@163.com (X. Xiao)

## 1. Synthesis of CHP

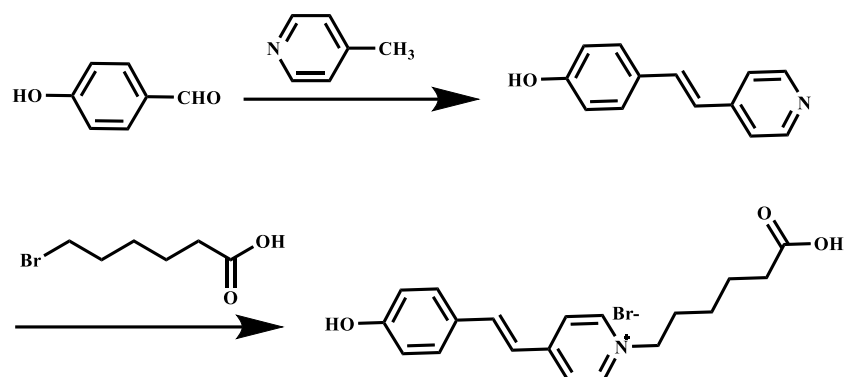

Figure S1. The synthesis route of guest CHP.

**4-[2-(4-Pyridinyl)ethenyl]phenol:** 2.5 g (0.020 mol) 4-hydroxybenzyl aldehyde and 2.7 g (0.029 mol) 4-methylpyridine were added to 15 ml acetic anhydride, and heated to reflux overnight. 50 ml distilled water was added to quench the reaction and the pH was adjusted to 9 using 5% NaOH. The precipitate was filtered and collected, and washed with cold ethanol 3-5 times to obtain a pale-yellow solid.

CHP: 4-[2-(4-Pyridinyl)ethenyl]phenol (0.2 g, 0.001 mol) and 6-bromohexanoic acid (1.0 g, 0.005 mol) were dissolved in acetonitrile (30 mL). The solution was stirred under an inert nitrogen atmosphere and heated to 80°C and refluxed for 12 h. The resultant solution was concentrated to approximately 5 ml by vacuum rotary evaporation, and was added dropwise to 40 ml acetone. After being filtered off, the light green precipitate (compound CHP) was washed several times with acetone and dried. <sup>1</sup>H NMR (D<sub>2</sub>O, 400 MHz): δ = 8.38 (d, J = 6.8 Hz, 2H), 7.79 (d, J = 6.8 Hz, 2H), 7.58 (d, 1H), 7.52 (d, J = 8.9 Hz, 2H), 7.08 (d, J = 16.3 Hz, 1H), 6.97 (d, J = 8.5 Hz, 2H), 4.25 (t, J = 7.2 Hz, 2H), 2.05 (t, J = 7.3 Hz, 2H), 1.75 (m, 2H), 1.37 (m, 2H), 1.11 (q, J = 7.2 Hz, 2H); <sup>13</sup>C NMR (DMSO-d<sub>6</sub>, 100 MHz): δ (ppm) = 175.23, 169.97, 153.81, 152.87, 145.25, 140.77, 133.88, 130.25, 124.82, 124.31, 123.57, 60.46, 34.23, 25.84, 24.71, 21.94. HRMS calcd for [M]<sup>+</sup>: m/z = 312.1594, found: m/z = 312.1601.

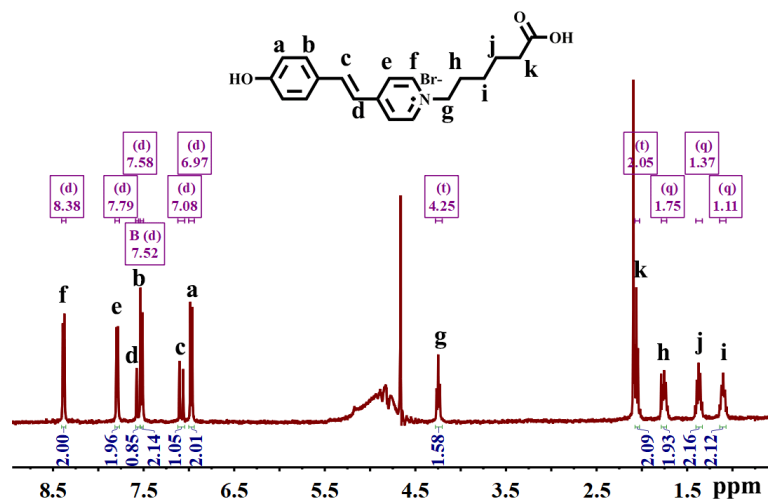

Figure S2.  $^1\text{H}$  NMR spectra of CHP in  $\text{D}_2\text{O}$  (400 MHz).

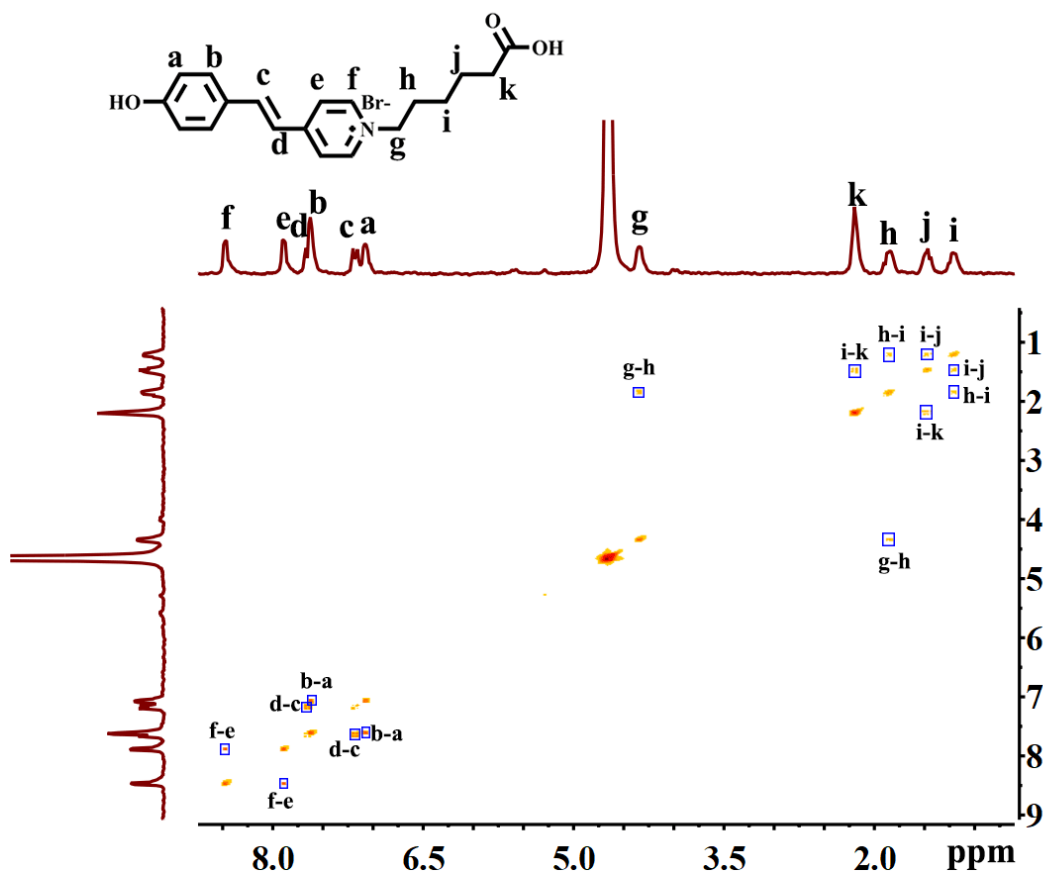

Figure S3. COSY NMR spectra of CHP in  $\text{D}_2\text{O}$  (400 MHz).

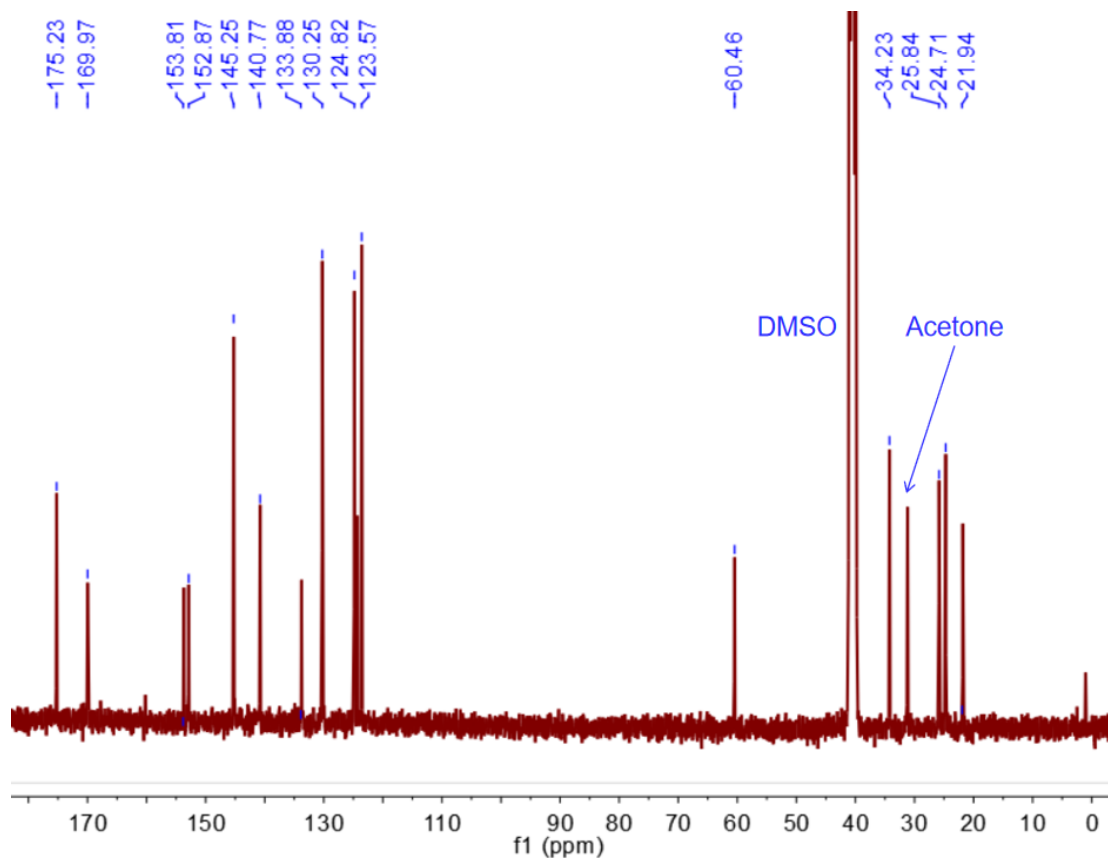

Figure S4.  $^{13}\text{C}$  NMR spectra of CHP in DMSO- $d_6$  (100 MHz).

## 2. The interaction between CHP and Q[8]

### 2.1 The UV absorption spectra

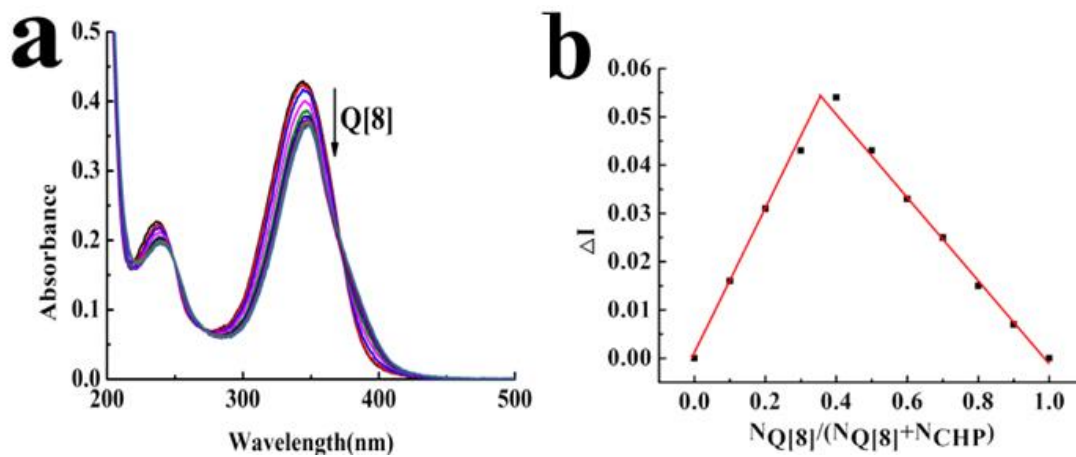

Figure S5. (a) Relationship between absorbance and  $N_{\text{Q}[8]}/N_{\text{CHP}}$ ; (b) Corresponding curve of  $\Delta I - N_{\text{Q}[8]}/(N_{\text{Q}[8]}+N_{\text{CHP}})$ .

## 2.2 The fluorescence spectroscopy

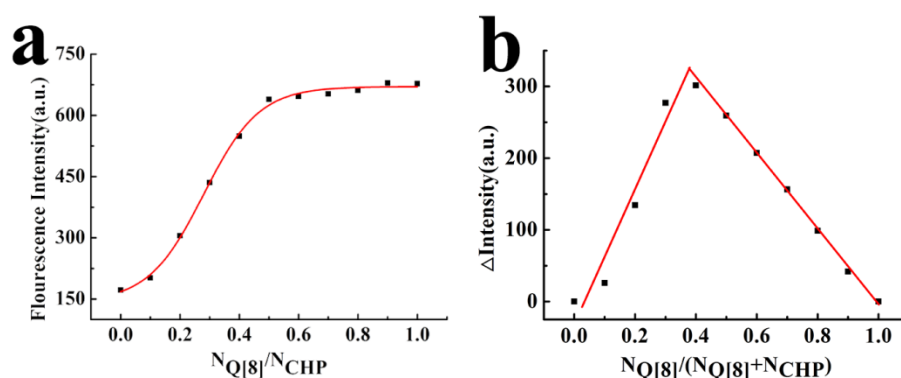

**Figure S6.** (a) Relationship between fluorescence intensity and  $N_{Q[8]}/N_{CHP}$ ; (b) Corresponding curve of  $\Delta A-N_{Q[8]}/(N_{Q[8]}+N_{CHP})$ .

## 2.3 The Isothermal titration calorimetry experiment

The first binding constant  $K_{a1}$  and the second binding constant  $K_{a2}$  are obtained by fitting the ITC curve using a sequential binding model.

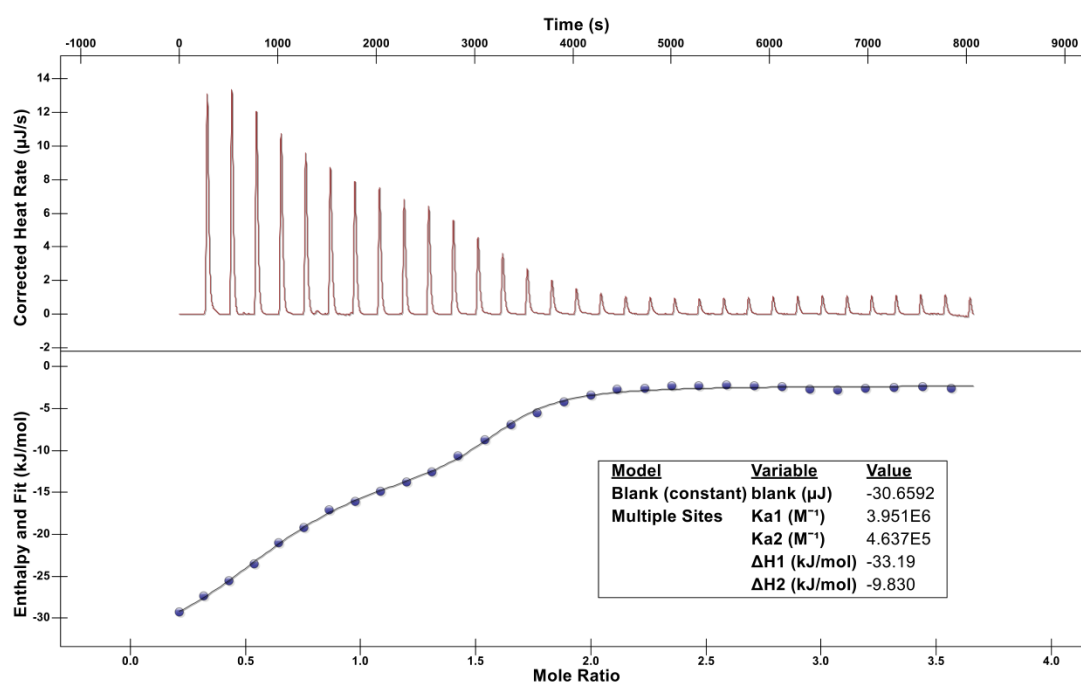

**Figure S7.** Isothermal titration calorimetry profiles of Q[8] in the presence of the guest CHP in aqueous solution at 298.15 K.

**Table S1.** ITC data of Q[8]-CHP

| $K_{a1}/(M^{-1})$   | $K_{a2}/(M^{-1})$   | $\Delta H_1 / (kJ \cdot mol^{-1})$ | $\Delta H_2 / (kJ \cdot mol^{-1})$ |
|---------------------|---------------------|------------------------------------|------------------------------------|
| $3.951 \times 10^6$ | $4.637 \times 10^5$ | -33.19                             | -9.830                             |

## 2.4 The association constants of CHP with Q[8] and Q[7]

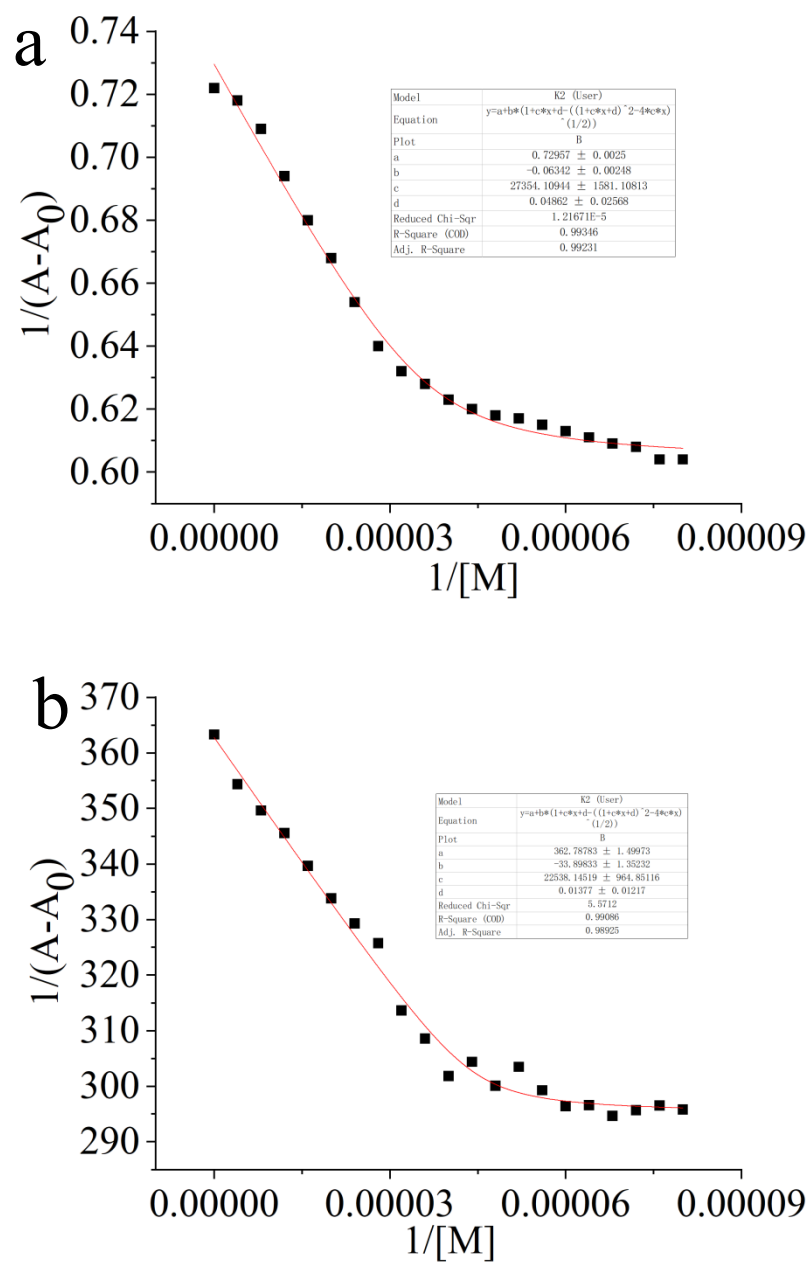

**Figure S8.** (a) The  $K_a$  of CHP with Q[7] by UV absorption spectra and (b) Fluorescence absorption spectra

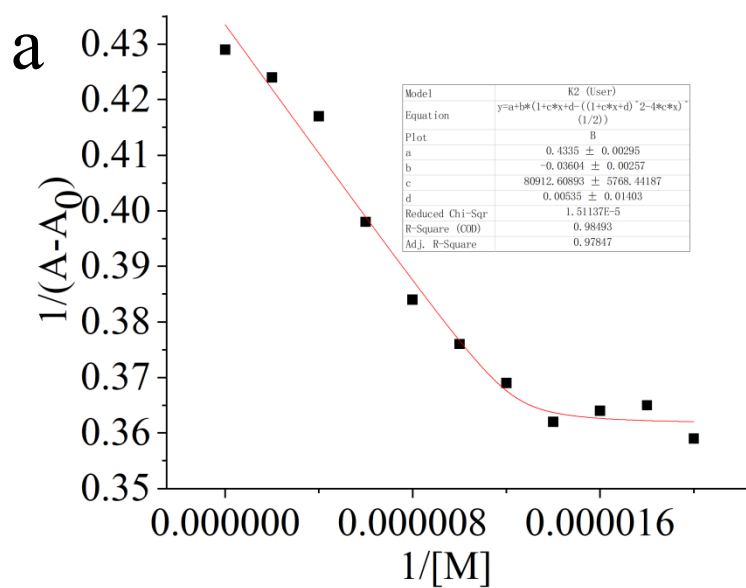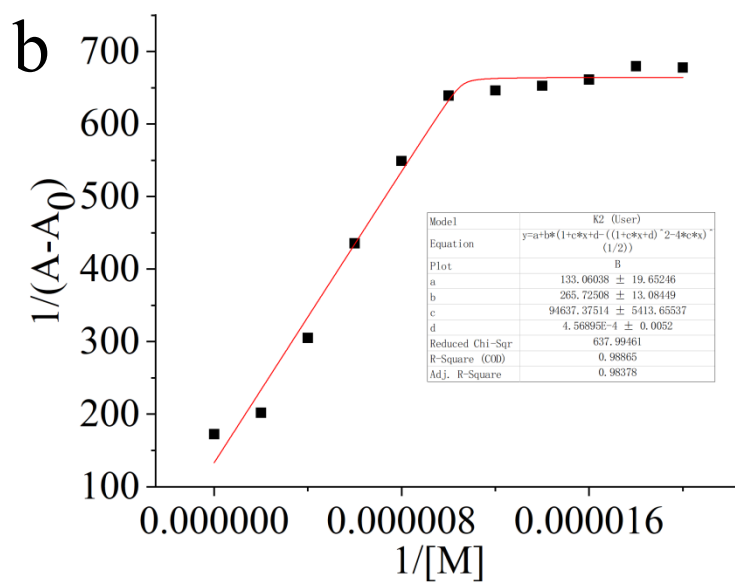

**Figure S9.** (a)The  $K_a$  of CHP with Q[8] by UV absorption spectra and (b) Fluorescence absorption spectra.

### 3. Interaction between CHP and Q[7]

#### 3.1 COSY NMR spectra of Q[7]-CHP

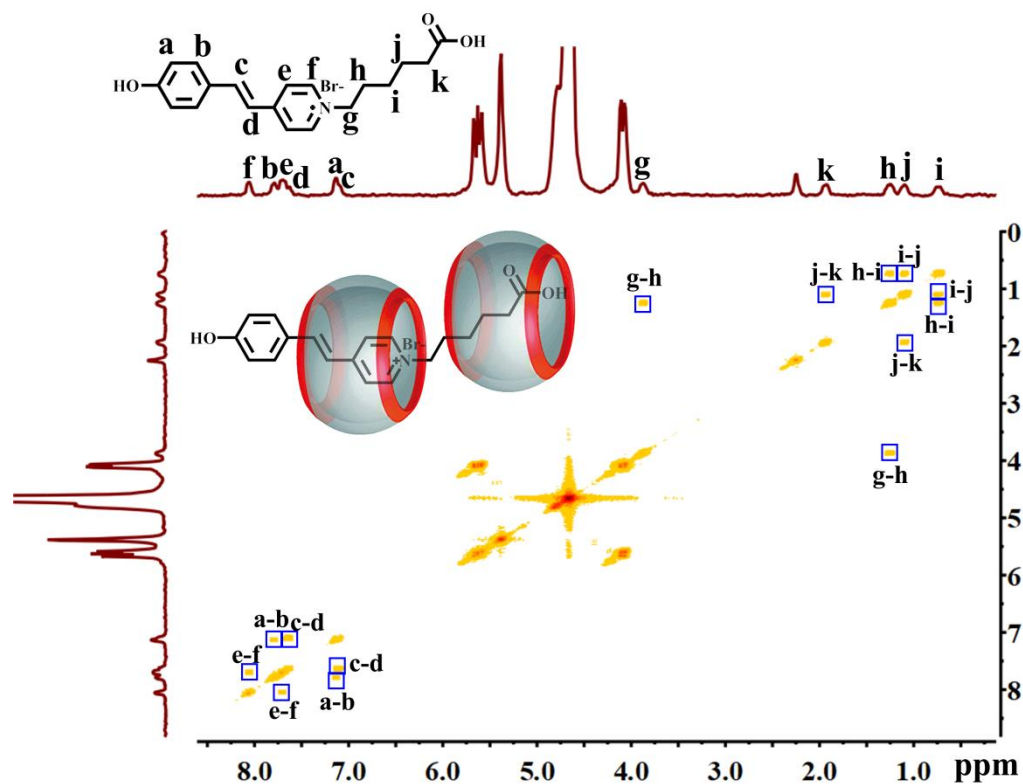

Figure S10. COSY NMR spectra of Q[7]-CHP in D<sub>2</sub>O (400 MHz).

#### 3.2 UV absorption spectra

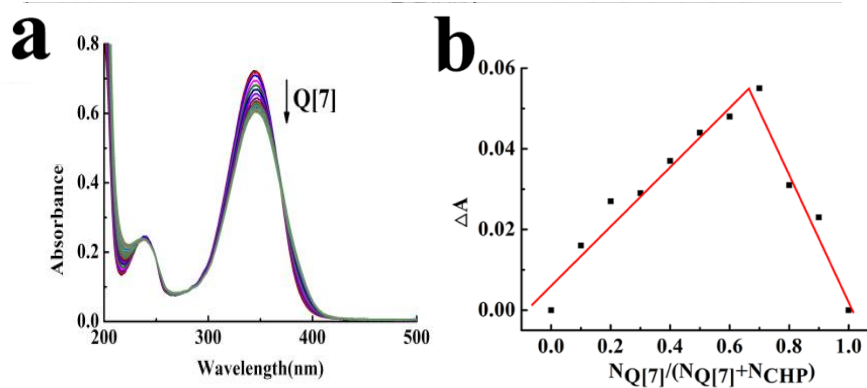

Figure S11. (a) Relationship between absorbance and  $N_{Q[7]}/N_{CHP}$ ; (b) Corresponding curve of  $\Delta A - N_{Q[7]}/(N_{Q[7]}+N_{CHP})$ .



### 3.3 Fluorescence spectroscopy

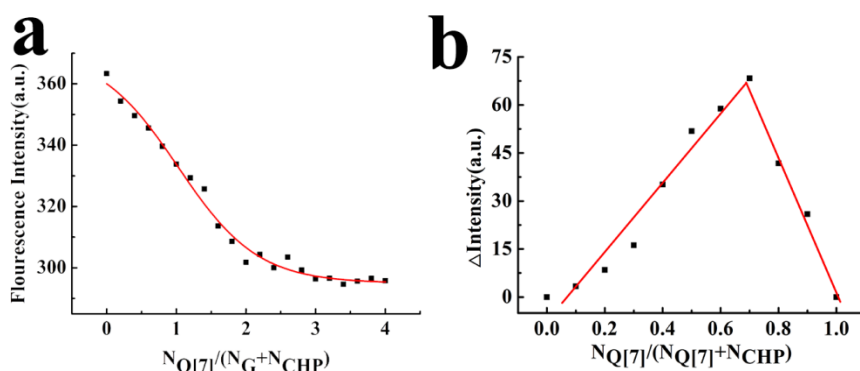

**Figure S12.** (a) Relationship between fluorescence intensity and  $N_{Q[7]}/N_{CHP}$ ; (b) Corresponding curve of  $\Delta A-N_{Q[7]}/(N_{Q[7]}+N_{CHP})$ .

### 3.4 The Isothermal titration calorimetry experiment

The first binding constant  $K_{a1}$  and the second binding constant  $K_{a2}$  are obtained by fitting the ITC curve using a sequential binding model.

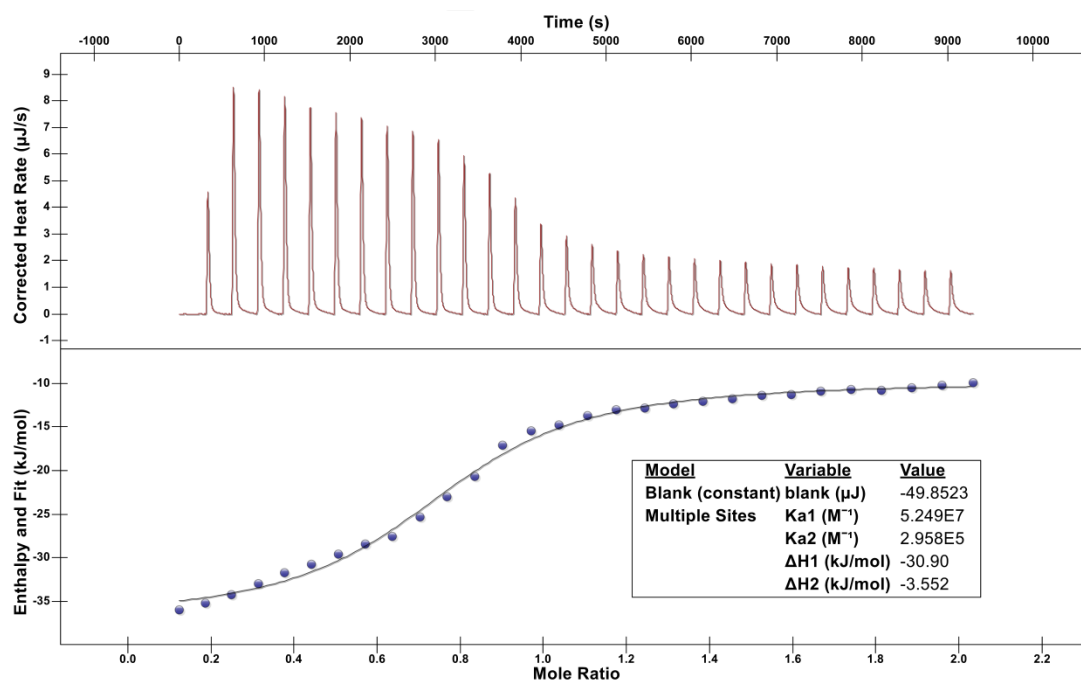

**Figure S13.** Isothermal titration calorimetry profiles of Q[7] in the presence of the guest CHP in aqueous solution at 298.15 K.

**Table S2.** ITC data of CHP@Q[7]

| $K_{a1}/(M^{-1})$   | $K_{a2}/(M^{-1})$   | $\Delta H_1 / (kJ \cdot mol^{-1})$ | $\Delta H_2 / (kJ \cdot mol^{-1})$ |
|---------------------|---------------------|------------------------------------|------------------------------------|
| $5.249 \times 10^7$ | $2.958 \times 10^5$ | -30.9                              | -3.552                             |

### 3.5 COSY NMR spectra of Q[7]-(*cis*-CHP)

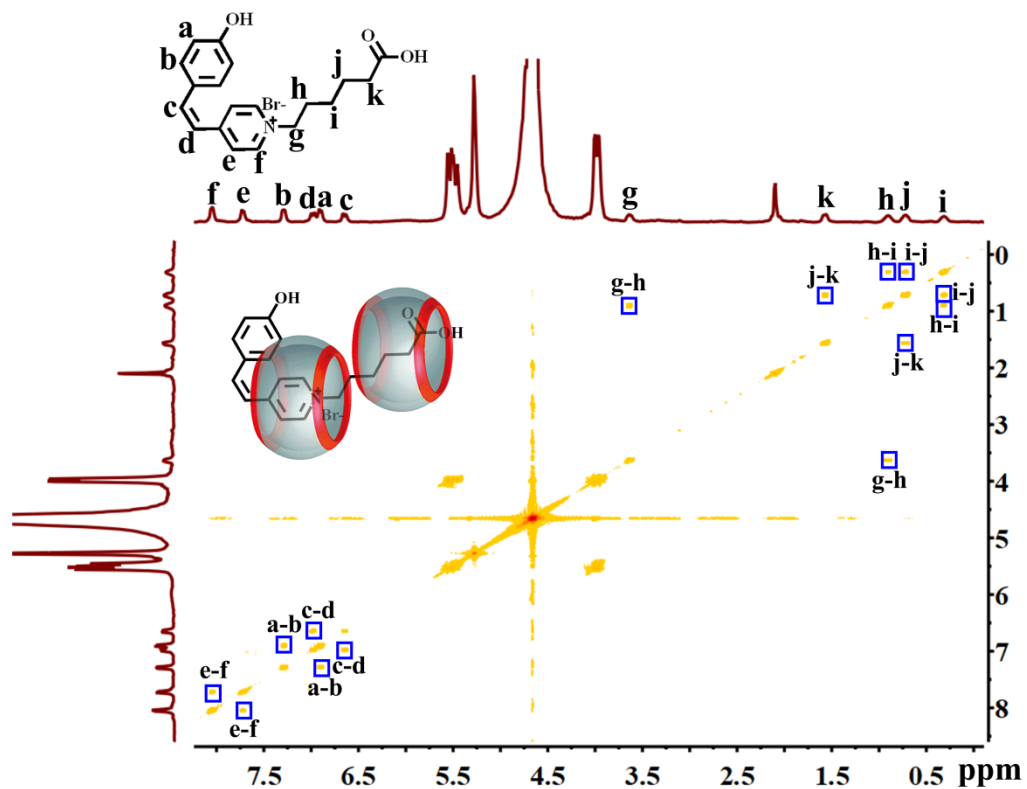

Figure S14. COSY NMR spectra of Q[7]-(*cis*-CHP) in D<sub>2</sub>O (400 MHz).

## 4. Photochemical reaction of CHP

### 4.1 Photodimerization of CHP catalyzed by Q[8]

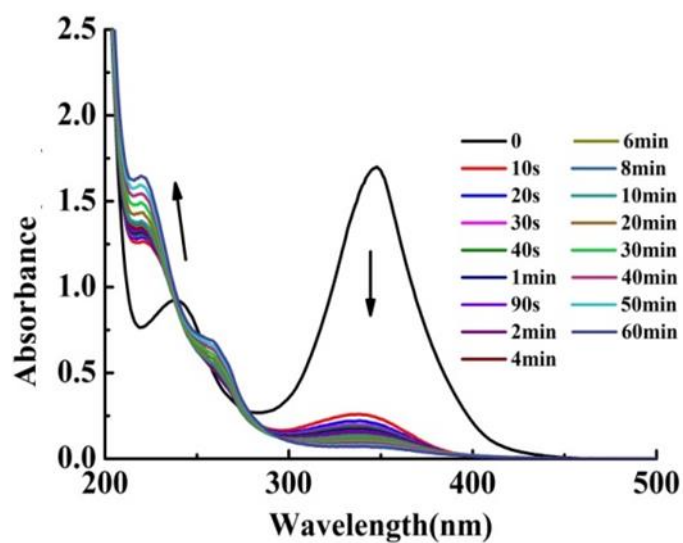

Figure S15. UV-Vis spectra of CHP solution ( $1 \times 10^{-4}$  mol/L) with UV irradiation in the presence of Q[8].

## 4.2 Photodimerization of CHP inhibited by Q[7]

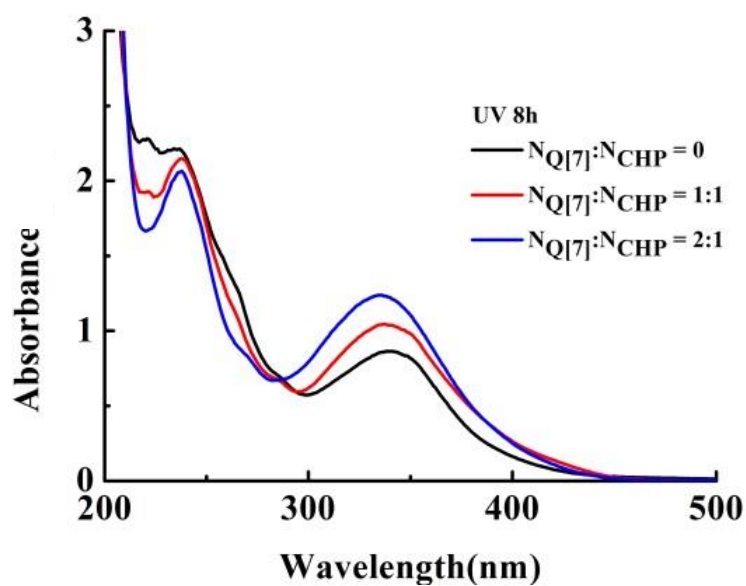

Figure S16. UV-visible spectra of CHP solutions ( $1 \times 10^{-4}$  mol/L) with different Q[7] contents after 8h of UV irradiation.

## 5. Analysis of the competitive effect of Q[7] and Q[8] in the presence of CHP

### 5.1 $^1\text{H}$ NMR spectrum

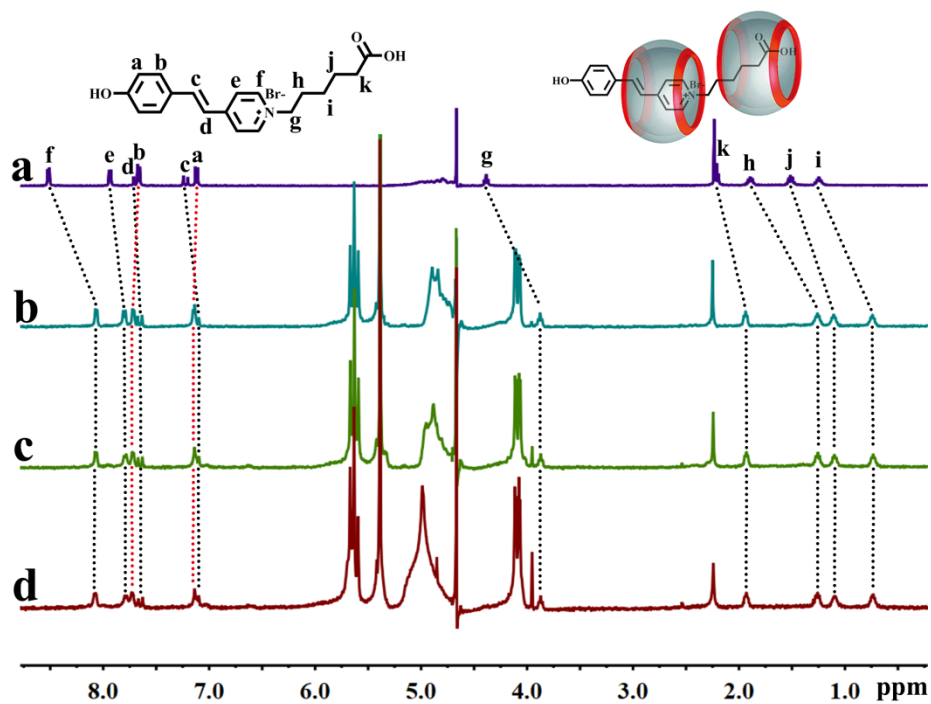

Figure S17.  $^1\text{H}$  NMR spectrum (400MHz,  $\text{D}_2\text{O}$ ) of (a) the guest CHP ( $1.0 \times 10^{-3}$  mol/L); (b) Q[7]-CHP; (c) on adding 0.5 equivalent of Q[8]; (d) on adding 1.0 equivalent of Q[8].

## 5.2 The fluorescence spectroscopy

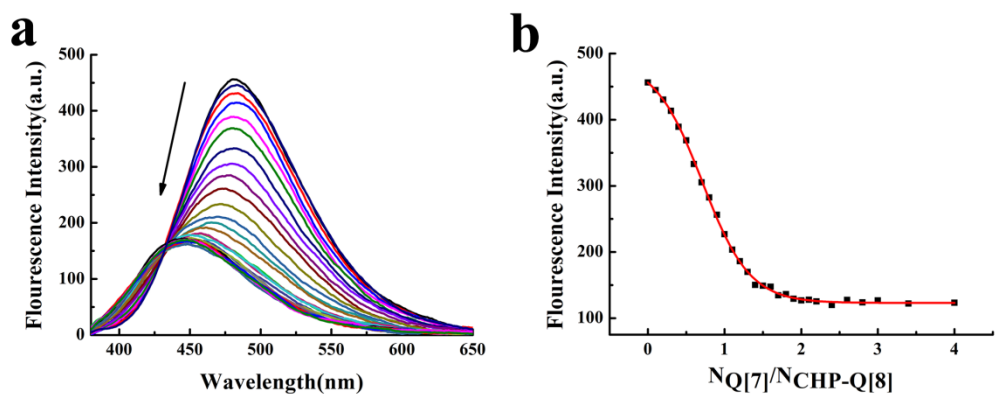

**Figure S18.** (a) Fluorescence spectra of Q[8]-CHP ( $2.0 \times 10^{-5}$  mol/L) on adding increased amounts of Q[7] (0, 0.1, 0.2... 4.0 equivalents); (b) Relationship between concentration and fluorescence emission and  $N_{Q[7]} / N_{CHP+Q[8]}$ .

## 6. Comparison of fluorescence intensity

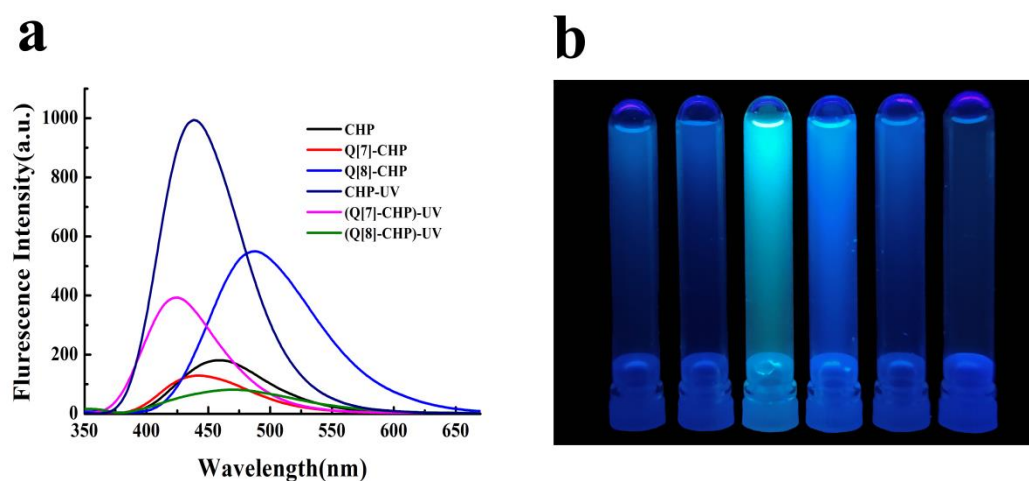

**Figure S19.** (a) Fluorescence spectra of CHP, CHP-Q[7], CHP-Q[8] after 8 hours of irradiation; (b) Photos under 365 nm ultraviolet light.

## 7. pKa of CHP

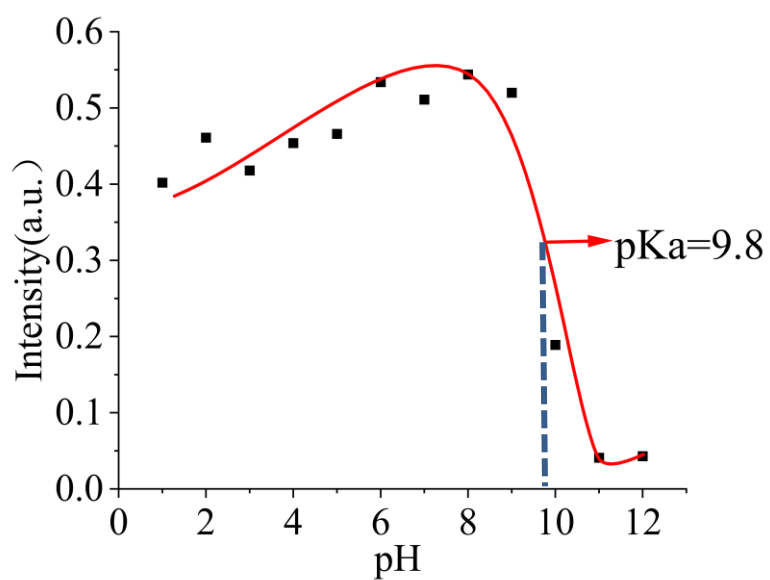

**Figure S20.** The pKa of CHP ( $2 \times 10^{-5} \text{ mol/L}^{-1}$ ) in aqueous solution.

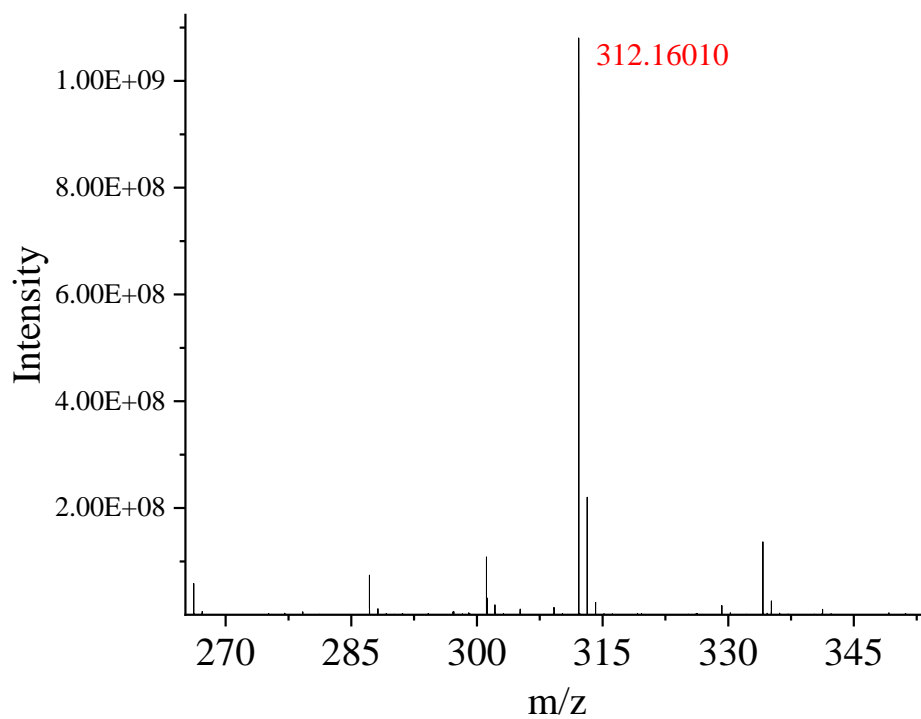

**Figure S21.** The HRMS spectrum of CHP.
